# Supplementary material
Source: publisher figshare collection journal article supplement (https://future-science-group.figshare.com/ndownloader/files/33917687)
Supplement: Supplementary file 1 [file 33917687]

# How does risdiplam compare with other treatments for Types 1–3 spinal muscular atrophy: A systematic literature review and indirect treatment comparison

Valerie Aponte Ribero, Monica Daigl, Yasmina Martí, Ksenija Gorni, Rachel Evans, David Alexander Scott, Anadi Mahajan, Keith R Abrams & Neil Hawkins

- No head-to-head clinical trials have directly compared the efficacy of risdiplam, nusinersen and onasemnogene abeparvovec in SMA
- Comparative efficacy and safety information is needed to inform treatment choice for patients with SMA
- Risdiplam trial data were indirectly compared with data from published nusinersen and onasemnogene abeparvovec studies using population-adjustment methodologies

## Population-adjustment methodology

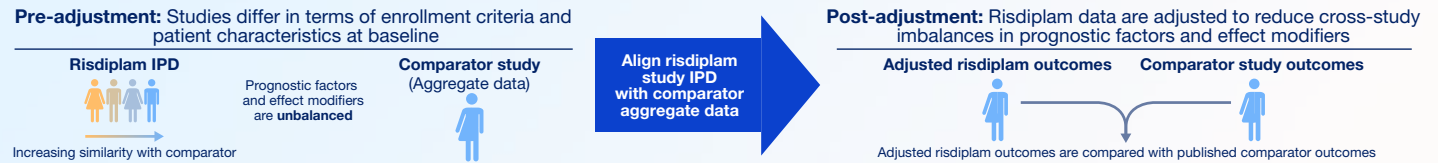

## Type 1 SMA: risdiplam versus nusinersen

- FIREFISH and ENDEAR enrolled patient populations with similar baseline characteristics
- MAIC methodology was applied to further reduce differences in prognostic factors and effect modifiers

| Baseline characteristics                 | Pre-matching: Risdiplam (FIREFISH) | Post-matching: Risdiplam (FIREFISH) | Average of nusinersen & BSC (ENDEAR) |
|------------------------------------------|------------------------------------|-------------------------------------|--------------------------------------|
| Sample size (ESS)                        | 58                                 | 58 (36.5)                           | 121                                  |
| Mean age at first dose, days             | 163                                | 169                                 | 169                                  |
| Mean disease duration at screening, days | 91                                 | 94                                  | 94                                   |
| Mean score on CHOP-INTEND                | 22.47                              | 27.24                               | 27.24                                |

## Event-free survival

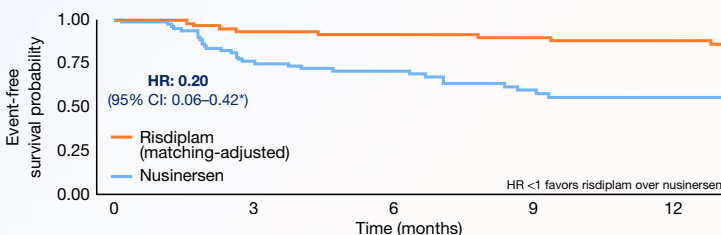

## CHOP-INTEND (achieving score of ≥40 points)

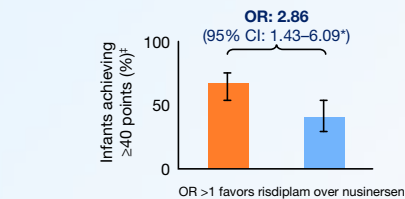

## Sitting without support (HINE-2)

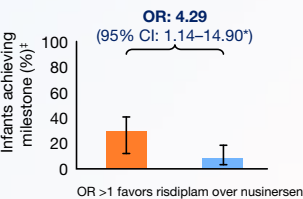

## Serious adverse events†

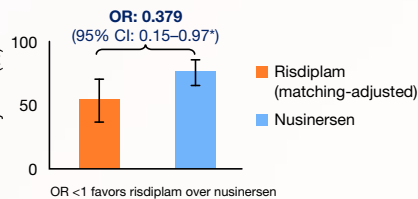

## Type 1 SMA: risdiplam versus onasemnogene abeparvovec

- FIREFISH and STR1VE-US were indirectly compared using STC methodology; MAIC was not feasible due to insufficient population overlap (ESS was 2.1)
- Results exhibited large uncertainty around the relative effect estimates due to population differences and small samples

## Types 2 and 3 SMA: risdiplam versus nusinersen

- SUNFISH enrolled a broader population compared with CHERISH; MAIC methodology was applied to adjust for population differences
- Results exhibited large uncertainty around the relative effect estimates due to substantial differences across populations

## Limitations

- Population-adjustment methodologies assume that all prognostic and predictive factors are balanced post-adjustment and cannot account for differences in study design or changes in standard of care

## Conclusions

- MAIC analyses suggested significantly prolonged survival, improvements in motor function, and reduced likelihood of SAEs with risdiplam versus nusinersen in Type 1 SMA
- No concrete conclusions could be drawn in comparisons of risdiplam with onasemnogene abeparvovec in Type 1 SMA and of risdiplam with nusinersen in Types 2 and 3 SMA

\*95% CIs that do not span 1 indicate a statistically significant difference. †SAEs reported in the studies were reflective of the underlying disease. The most frequent SAEs were pneumonia for risdiplam and respiratory distress for nusinersen.  
\*CHOP-INTEND and HINE-2 outcomes were compared at a median follow-up of ~9 months.  
BSC, best supportive care; CHOP-INTEND, Children's Hospital of Philadelphia Infant Test of Neuromuscular Disorders; CI, confidence interval; ESS, effective sample size; HINE-2, Hammersmith Infant Neurological Examination, Section 2; HR, hazard ratio; IPD, individual patient data; MAIC, matching-adjusted indirect comparison; OR, odds ratio; SAE, serious adverse event; SMA, spinal muscular atrophy; STC, simulated treatment comparison.
